# Supplementary material for: Ligand hierarchy on driving the crystal packing. Effect of supramolecular interactions on solid-state conformations adopted by saccharinate Pd(ii) complexes
Source: Royal Society of Chemistry journal article supplement (doi:10.1039/c4ce00518j), 2014-05-15

|                                                                                                                                                                                                                                                                                                                                                            | <b>2</b>                | <b>4</b>                | <b>5·(CH<sub>3</sub>)<sub>2</sub>SO</b> | <b>6</b>                | <b>7</b>          |
|------------------------------------------------------------------------------------------------------------------------------------------------------------------------------------------------------------------------------------------------------------------------------------------------------------------------------------------------------------|-------------------------|-------------------------|-----------------------------------------|-------------------------|-------------------|
| Formula                                                                                                                                                                                                                                                                                                                                                    | C22 H16 N6 O6<br>Pd1 S2 | C18 H20 N2<br>O6 Pd1 S4 | C18 H22 N2 O8 Pd<br>S4                  | C26 H20 N6 O8 Pd1<br>S2 | C20 H20 N6 O6 Pd1 |
| <i>M</i>                                                                                                                                                                                                                                                                                                                                                   | 630.92                  | 595.00                  | 629.02                                  | 715.01                  | 546.82            |
| Crystal system                                                                                                                                                                                                                                                                                                                                             | monoclinic              | monoclinic              | orthorhombic                            | monoclinic              | monoclinic        |
| Space group                                                                                                                                                                                                                                                                                                                                                | P21/c                   | P21/a                   | Cmc21                                   | P21/c                   | P21/a             |
| <i>Z</i>                                                                                                                                                                                                                                                                                                                                                   | 2                       | 2                       | 4                                       | 2                       | 2                 |
| <i>a</i> / Å                                                                                                                                                                                                                                                                                                                                               | 8.0530(3)               | 8.3977(14)              | 22.245(2)                               | 12.03223(12)            | 9.67234(10)       |
| <i>b</i> / Å                                                                                                                                                                                                                                                                                                                                               | 9.7220(4)               | 11.2186(18)             | 13.6954(14)                             | 14.00604(15)            | 14.37138(15)      |
| <i>c</i> / Å                                                                                                                                                                                                                                                                                                                                               | 16.0510(4)              | 12.2070(20)             | 7.5899(8)                               | 9.78155(10)             | 8.18547(10)       |
| $\alpha$ / °                                                                                                                                                                                                                                                                                                                                               | 90                      | 90                      | 90                                      | 90                      | 90                |
| $\beta$ / °                                                                                                                                                                                                                                                                                                                                                | 96.788(2)               | 108.288(5)              | 90                                      | 110.8723(13)            | 92.73275(10)      |
| $\gamma$ / °                                                                                                                                                                                                                                                                                                                                               | 90                      | 90                      | 90                                      | 90                      | 90                |
| <i>V</i> / Å <sup>3</sup>                                                                                                                                                                                                                                                                                                                                  | 1247.84(8)              | 1091.9(3)               | 2312.3(4)                               | 1540.25(3)              | 1136.53(3)        |
| <i>T</i> / K                                                                                                                                                                                                                                                                                                                                               | 293(2)                  | 293(2)                  | 293(2)                                  | 293(2)                  | 293(2)            |
| $\lambda$ / Å                                                                                                                                                                                                                                                                                                                                              | 0.71073                 | 0.71073                 | 0.71073                                 | 0.82690                 | 0.82690           |
| $\mu$ / mm <sup>-1</sup>                                                                                                                                                                                                                                                                                                                                   | 0.962                   | 1.271                   | 1.212                                   |                         |                   |
| Reflections collected                                                                                                                                                                                                                                                                                                                                      | 10326                   | 28341                   | 13931                                   |                         |                   |
| Independent reflections                                                                                                                                                                                                                                                                                                                                    | 2890                    | 2725                    | 2885                                    |                         |                   |
| Goodness-of-fit on <i>F</i> <sup>2</sup>                                                                                                                                                                                                                                                                                                                   | 1.041                   | 1.065                   | 1.065                                   |                         |                   |
| Final <i>R</i> indices<br>[ <i>I</i> > 2σ( <i>I</i> )] <sup>[a,b]</sup>                                                                                                                                                                                                                                                                                    | 0.0397                  | 0.0567                  | 0.0396                                  |                         |                   |
| <i>R</i> indices<br>(all data) <sup>[a,b]</sup>                                                                                                                                                                                                                                                                                                            | 0.0772                  | 0.0606                  | 0.0418                                  |                         |                   |
| Max /min<br>$\Delta\rho$ [e·Å <sup>-3</sup> ]                                                                                                                                                                                                                                                                                                              | 0.572<br>-1.229         | 1.609<br>-2.908         | 1.874<br>-0.883                         |                         |                   |
| <sup>[a]</sup> $R_1 = \sum \ F_o\  - \ F_c\  / \sum \ F_o\ $ for reflections with <i>I</i> > 2σ <i>I</i> . <sup>[b]</sup> $wR_2 = \{\sum[w(F_o^2 - F_c^2)^2] / \sum[w(F_o^2)^2]\}^{1/2}$<br>for all reflections;<br>$w^{-1} = \sigma^2(F^2) + (aP)^2 + bP$ , in which $P = (2F_c^2 + F_o^2)/3$ and <i>a</i> and <i>b</i> are constants set by the program. |                         |                         |                                         |                         |                   |

## S2. Plots for the Rietveld refinement of 6 and 7

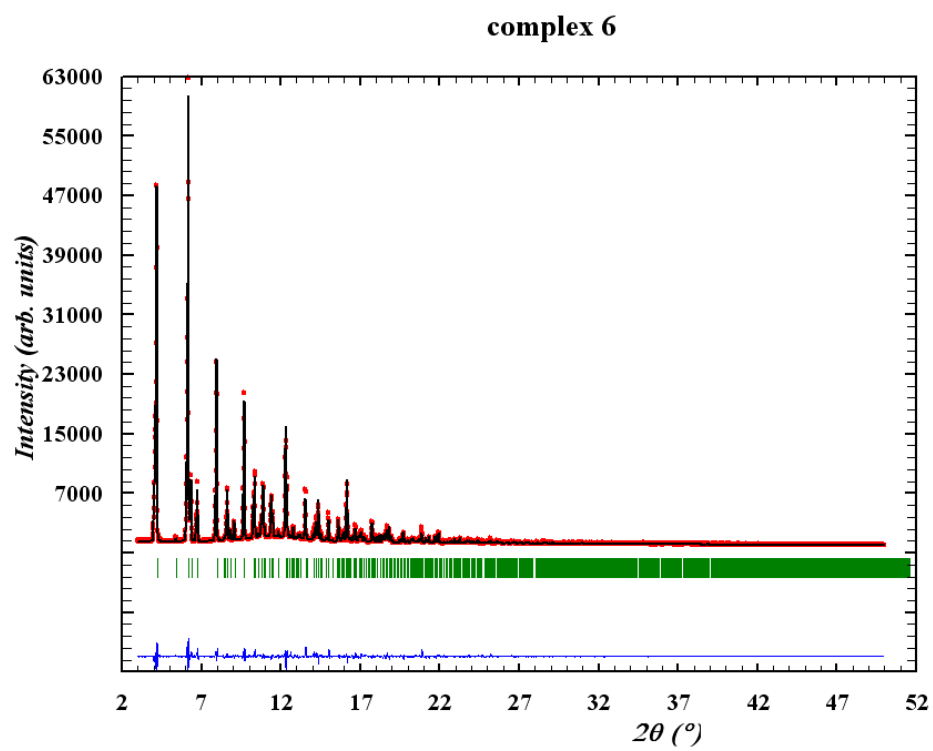

complex 7

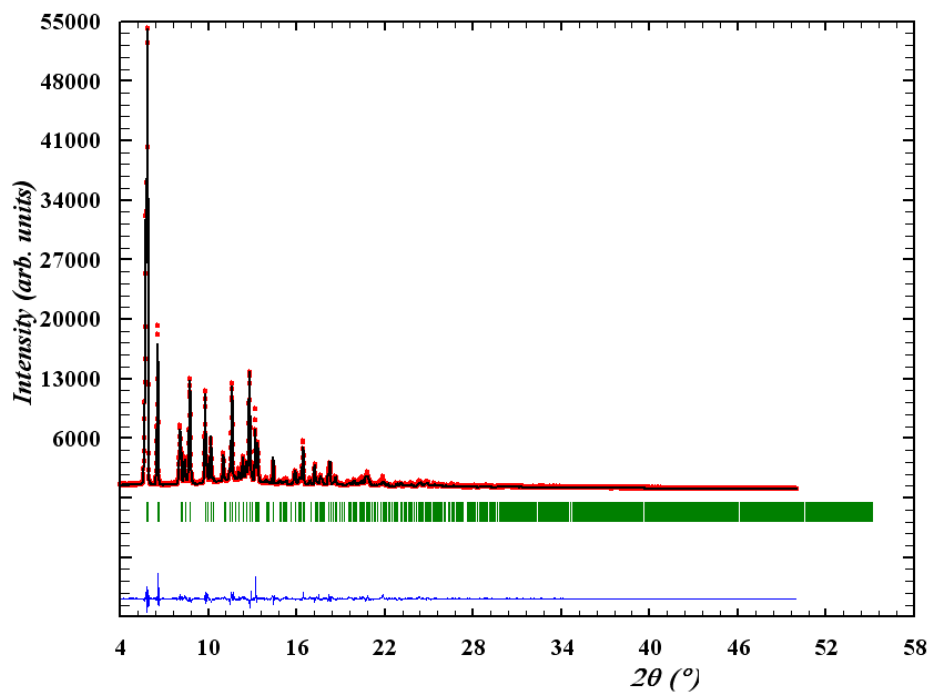

S3 Crystal packing of [Pd(succ)<sub>2</sub>(nicot)<sub>2</sub>] (7)

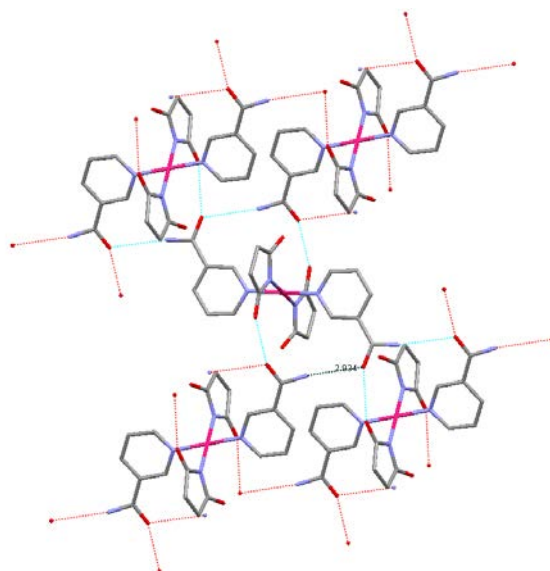

**S4.** (B3LYP-D3/def2-TZVPPecp//B3LYP-D3/def2-TZVP) energy diagram (kcal/mol) for rotation of the Pd-S bond in model complex **5**

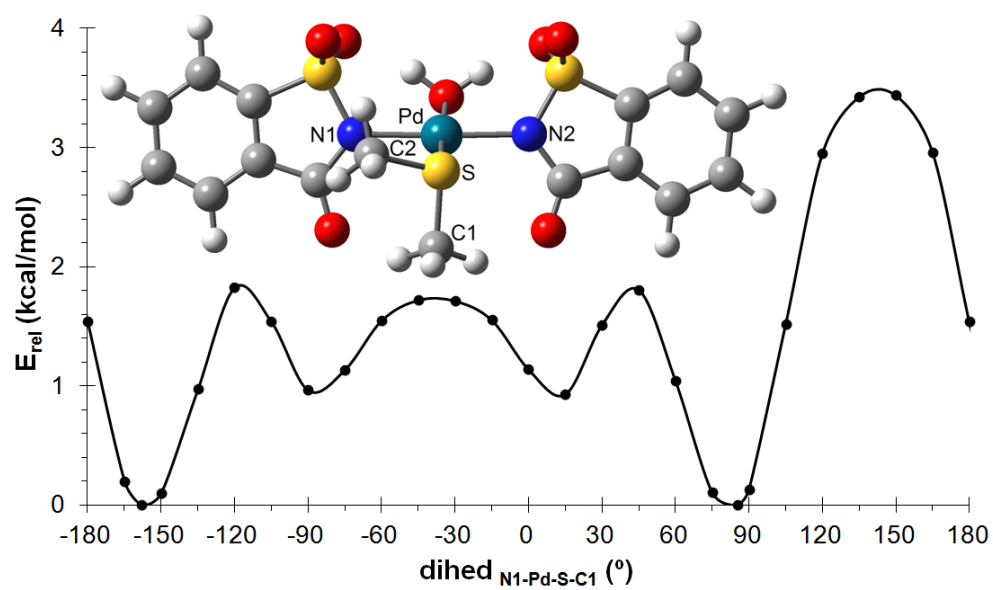

Supplement: c4ce00518j1.pdf [file c4ce00518j1.pdf]
